# Supplementary material
Source: PubMed Central journal article supplement (PMC4581603)
Supplement: supp_ddv294_ddv294supp.pdf [file supp_ddv294_ddv294supp.pdf]

## SUPPLEMENTAL DATA

**Table S1. Sample characteristics**

|                 | <b>Mean (SD) or proportions</b> |
|-----------------|---------------------------------|
| SYS adolescents |                                 |
| Sample size (n) | 132                             |
| Males/females   | 0.50/0.50                       |
| Age (years)     | 15.6 (1.4)                      |
| SYS parents     |                                 |
| Sample size (n) | 278                             |
| Males/females   | 0.50/0.50                       |
| Age (years)     | 43.3 (5.0)                      |
| IMAGEN          |                                 |
| Sample size (n) | 639                             |
| Males/females   | 0.47/0.53                       |
| Age (years)     | 15.0 (0)                        |
| OFCCR           |                                 |
| Sample size (n) | 1,747                           |
| Males/females   | 0.49/0.51                       |
| Age (years)     | 63.7 (8.2)                      |
| Cases/controls  | 0.51/0.49                       |

**Table S2. Polymorphic CpGs loading into PC1 and their respective *local* meQTLs (SNP ID, position and minor allele frequency [MAF])**

| CpG ID     | CpG position | SNP ID      | SNP position | MAF (SYS adolescents) |
|------------|--------------|-------------|--------------|-----------------------|
| cg17369694 | 32,485,396   | rs112749594 | 32,485,397   | 0.25                  |
| cg01341801 | 32,489,203   | rs114828939 | 32,489,204   | 0.21                  |
| cg23365293 | 32,489,984   | rs111522006 | 32,489,985   | 0.14                  |
| cg08265274 | 32,490,444   | rs145638935 | 32,490,444   | 0.05                  |
| cg22627029 | 32,520,615   | rs113201078 | 32,520,615   | 0.10                  |
| cg25140213 | 32,522,683   | rs35373206  | 32,522,683   | 0.10                  |
| cg10995422 | 32,522,872   | rs67218022  | 32,522,872   | 0.29                  |
| cg24638099 | 32,526,027   | rs150543195 | 32,526,028   | 0.12                  |
| cg11752699 | 32,526,669   | rs34195497  | 32,526,670   | 0.14                  |
| cg26590106 | 32,548,321   | rs9269762   | 32,548,321   | 0.17                  |
| cg11404906 | 32,551,749   | NA          | NA           | NA                    |
| cg09139047 | 32,552,042   | rs183889763 | 32,552,043   | 0.05                  |
| cg15602423 | 32,552,095   | rs188617679 | 32,552,096   | 0.06                  |
| cg00211215 | 32,552,246   | NA          | NA           | NA                    |
| cg09949906 | 32,552,350   | rs28724124  | 32,552,350   | 0.09                  |
| cg22933800 | 32,605,704   | NA          | NA           | NA                    |
| cg24470466 | 32,608,858   | rs4455710   | 32,608,858   | 0.37                  |
| cg11784298 | 32,610,971   | rs1130158   | 32,610,972   | 0.47                  |
| cg14323910 | 32,628,305   | NA          | NA           | NA                    |
| cg10180404 | 32,632,334   | rs143732234 | 32,632,335   | 0.25                  |
| cg10180404 | 32,632,334   | rs9274341   | 32,632,336   | 0.23                  |
| cg21493951 | 32,632,338   | NA          | NA           | NA                    |
| cg18572898 | 32,712,103   | rs114448843 | 32,712,104   | 0.40                  |
| cg07389699 | 32,728,786   | rs116328271 | 32,728,787   | 0.38                  |
| cg24080129 | 32,797,488   | rs4148874   | 32,797,488   | 0.32                  |

**Table S3. Summary of HaploReg transcription factor position weight matrix (PWM) analysis of rs4959030**

| PWM             | Strand | Ref  | Alt  | Ref: TAGGCCCAGAATTCTGCATGGTGGGTAGGAGCTGTGGCTTGTCTTGAAGCTGGATGTGC |
|-----------------|--------|------|------|------------------------------------------------------------------|
| BCL_disc7       | -      | 15.2 | 3.7  | RGGMGCTGT                                                        |
| BDP1_disc3      | +      | 12.4 | 12.8 | SNNNDRGSWSDGRS                                                   |
| CCNT2_disc2     | -      | 9.2  | 12.5 | RGGGBHGGGG                                                       |
| Ets_disc5       | +      | 11.1 | 7.8  | GGAGTTGT                                                         |
| Evi-1_5         | -      | 11.9 | 13.1 | BBYTGTGGYYW                                                      |
| PU.1_disc3      | +      | -0.4 | 11.6 | RGVVVNDGSVSDSDS                                                  |
| RREB-1_1        | -      | -6.5 | 5.4  | KKKKKKKKKTGGGK                                                   |
| Sin3Ak-20_disc4 | -      | 16.7 | 5.1  | MGSWGCTGT                                                        |

Shown are the PWMs that match a collection of PWMs collected by HaploReg. PWMs that matched either the reference (Ref) or alternative (Alt) at a given threshold and overlapped the sequence variant are shown (see HaploReg for details). The log-odds (LOD) score for each match is shown for the Ref (A) Alt (G) allele. IUPAC abbreviations for PWMs are shown at aligned positions of rs4959030. Note the hg19 Ref allele is the minor allele.

**Table S4. LD between the meQTL (rs4959030) and 18 previously identified loci of disease in GWAS of European ancestry (only loci with  $r^2 > 0.2$  within 32.18-32.67Mb on chromosome 6 are shown)**

| SNP ID           | LD ( $r^2$ ) with rs4959030 | Disease/Trait                | P                | PubMed ID       | Journal                      |
|------------------|-----------------------------|------------------------------|------------------|-----------------|------------------------------|
| rs3132946        | 0.58                        | Interstitial lung disease    | 8.00E-06         | 23583980        | <i>Nat Genet</i>             |
| <b>rs3129934</b> | <b>0.59</b>                 | <b>Multiple sclerosis</b>    | <b>7.00E-16</b>  | <b>22457343</b> | <b><i>Mult Scler</i></b>     |
| <b>rs3129934</b> | <b>0.59</b>                 | <b>Multiple sclerosis</b>    | <b>9.00E-11</b>  | <b>18941528</b> | <b><i>PLoS One</i></b>       |
| rs4959027        | 0.42                        | Pubertal anthropometrics     | 9.00E-07         | 23449627        | <i>Hum Mol Genet</i>         |
| <b>rs3129871</b> | <b>0.20</b>                 | <b>Multiple sclerosis</b>    | <b>6.00E-15</b>  | <b>23472185</b> | <b><i>PLoS One</i></b>       |
| <b>rs3129871</b> | <b>0.20</b>                 | <b>Multiple sclerosis</b>    | <b>1.00E-16</b>  | <b>23472185</b> | <b><i>PLoS One</i></b>       |
| <b>rs3135388</b> | <b>0.80</b>                 | <b>Multiple sclerosis</b>    | <b>4.00E-225</b> | <b>19525953</b> | <b><i>Nat Genet</i></b>      |
| <b>rs3135388</b> | <b>0.80</b>                 | <b>Multiple sclerosis</b>    | <b>9.00E-81</b>  | <b>17660530</b> | <b><i>N Engl J Med</i></b>   |
| rs2227139        | 0.31                        | Hematological parameters     | 1.00E-07         | 19820697        | <i>Nat Genet</i>             |
| <b>rs3129889</b> | <b>0.80</b>                 | <b>Multiple sclerosis</b>    | <b>1.00E-206</b> | <b>22190364</b> | <b><i>Ann Neurol</i></b>     |
| rs6903608        | 0.30                        | Hodgkin's lymphoma           | 5.00E-27         | 24149102        | <i>Nat Commun</i>            |
| rs6903608        | 0.30                        | Hodgkin's lymphoma           | 3.00E-50         | 21037568        | <i>Nat Genet</i>             |
| <b>rs3828840</b> | <b>0.26</b>                 | <b>Multiple sclerosis</b>    | <b>5.00E-15</b>  | <b>23472185</b> | <b><i>PLoS One</i></b>       |
| rs9271192        | 0.35                        | Alzheimer's disease          | 3.00E-12         | 24162737        | <i>Nat Genet</i>             |
| rs9271348        | 0.27                        | Rheumatoid arthritis         | 5.00E-07         | 24532677        | <i>Ann Rheum Dis</i>         |
| <b>rs9271366</b> | <b>0.76</b>                 | <b>Multiple sclerosis</b>    | <b>4.00E-17</b>  | <b>20598377</b> | <b><i>J Neuroimmunol</i></b> |
| <b>rs9271366</b> | <b>0.76</b>                 | <b>Multiple sclerosis</b>    | <b>7.00E-184</b> | <b>19525955</b> | <b><i>Nat Genet</i></b>      |
| <b>rs9271640</b> | <b>0.38</b>                 | <b>Multiple sclerosis</b>    | <b>2.00E-20</b>  | <b>23472185</b> | <b><i>PLoS One</i></b>       |
| rs9274407        | 0.49                        | Drug-induced liver injury    | 5.00E-14         | 21570397        | <i>Gastroenterology</i>      |
| <b>rs3129720</b> | <b>0.48</b>                 | <b>Multiple sclerosis</b>    | <b>5.00E-15</b>  | <b>23472185</b> | <b><i>PLoS One</i></b>       |
| rs3129720        | 0.48                        | Hypothyroidism               | 5.00E-07         | 22493691        | <i>PLoS One</i>              |
| rs6457617        | 0.20                        | Systemic sclerosis           | 2.00E-37         | 21750679        | <i>PLoS Genet</i>            |
| rs6457617        | 0.20                        | Systemic sclerosis           | 4.00E-17         | 20383147        | <i>Nat Genet</i>             |
| rs6457617        | 0.20                        | Rheumatoid arthritis         | 1.00E-09         | 18668548        | <i>Arthritis Rheum</i>       |
| rs6457617        | 0.20                        | Rheumatoid arthritis         | 5.00E-75         | 17554300        | <i>Nature</i>                |
| rs6457620        | 0.20                        | Height                       | 2.00E-16         | 20881960        | <i>Nature</i>                |
| rs6457620        | 0.20                        | Rheumatoid arthritis         | 4.00E-186        | 18794853        | <i>Nat Genet</i>             |
| rs2647012        | 0.31                        | Follicular lymphoma          | 2.00E-21         | 21533074        | <i>PLoS Genet</i>            |
| rs2647012        | 0.31                        | Systemic lupus erythematosus | 8.00E-06         | 21408207        | <i>PLoS Genet</i>            |

**Figure S1: Principal component analysis of unadjusted (A) and adjusted (B) DNAm- $\beta$  values of 1,000 most variable CpGs in the genome.** Panel A shows the two distinctive clusters (indicated by red and black dots) revealed by the original PCA of unadjusted DNAm- $\beta$  values. Panel B suggests that this clustering pattern is not fully explained by age, sex, batch and blood cell proportions.

**Figure S2: Heritability ( $h^2$ ) of DNA methylation and the relative contributions ( $r^2$ ) of the *long-range* and *local* meQTLs to methylation of CpGs within the studied 300-kb genomic region.** The heritability estimates ( $h^2$ ), obtained using the combined sample of SYS adolescents and their parents, are indicated by green lines. The relative contributions ( $r^2$ ) of the *long-range* and respective *local* meQTLs are indicated by purple lines and yellow lines with stars, respectively. Grey triangles indicate the combined contribution of the *long-range* and respective *local* meQTLs at each assessed CpG. The top panel includes the 25 highly variable CpGs loading into PC1 (including 19 polymorphic CpGs). The middle panel includes a total of 456 CpGs (including 85 polymorphic CpGs). The bottom panel includes the same 456 CpGs, which are equally spaced for better visualization.

**Figure S3: The relative contributions of *local* meQTLs to methylation of CpGs within the studied genomic region.** The contributions are shown as proportions of ‘variance explained’ ( $r^2$ ) by *local* meQTL (independently of the *long-range* meQTL, yellow lines with stars). Grey triangles indicate the combined contribution of the *long-range* and respective *local* meQTLs at each assessed CpG. The top panel includes the 25 highly variable CpGs loading into PC1 (including 19 polymorphic CpGs). The middle panel includes a total of 456 CpGs (including 85 polymorphic CpGs). The bottom panel includes a total 5,663 CpGs (including 273 polymorphic CpGs) located within the region of high linkage disequilibrium with meQTL (as shown in Figure 1).

**Figure S4: Inter- and intra-species analysis of the *long-range* meQTL (rs4959030).** (A) The region surrounding rs495930 is primate specific and the hg19 reference sequence for rs4959030 is the minor allele A. The multiple sequence alignments were taken from the Vertebrate Multiz Alignment (100 species) from the UCSC genome browser. (B) The hg19 reference allele for rs4959030 (minor allele A) disrupts a PU.1 motif (PU.1\_disc3). The PU.1\_disc3 (also known as SPI1\_disc3) motif was obtained from Kheradpour and Kellis (66) and plotted as a sequence logo using RSAT (67).

**Figure S5: Association of the *long-range* meQTL (rs4959030) with fractional anisotropy assessed with diffusion tensor imaging of the human brain.** A subset of SYS parents with relevant brain imaging data (n=309) was studied. The association was tested while adjusting for sex and age.

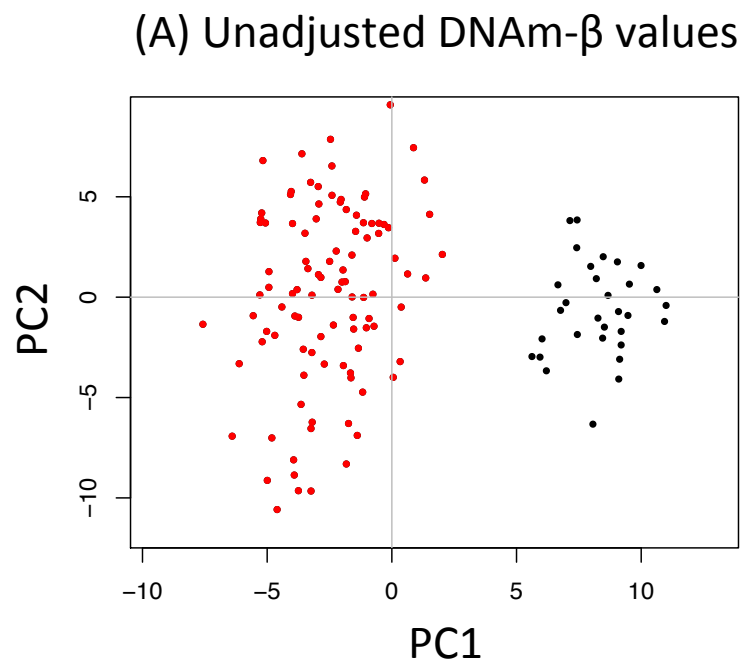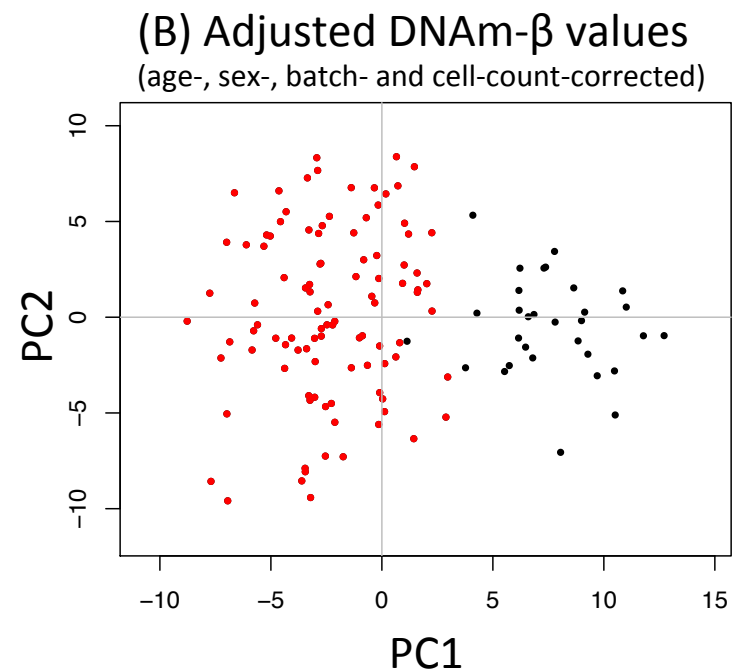

Figure S1. Principal component analysis of unadjusted (A) and adjusted and (B) DNAm- $\beta$  values of 1,000 most variable CpGs in the genome.

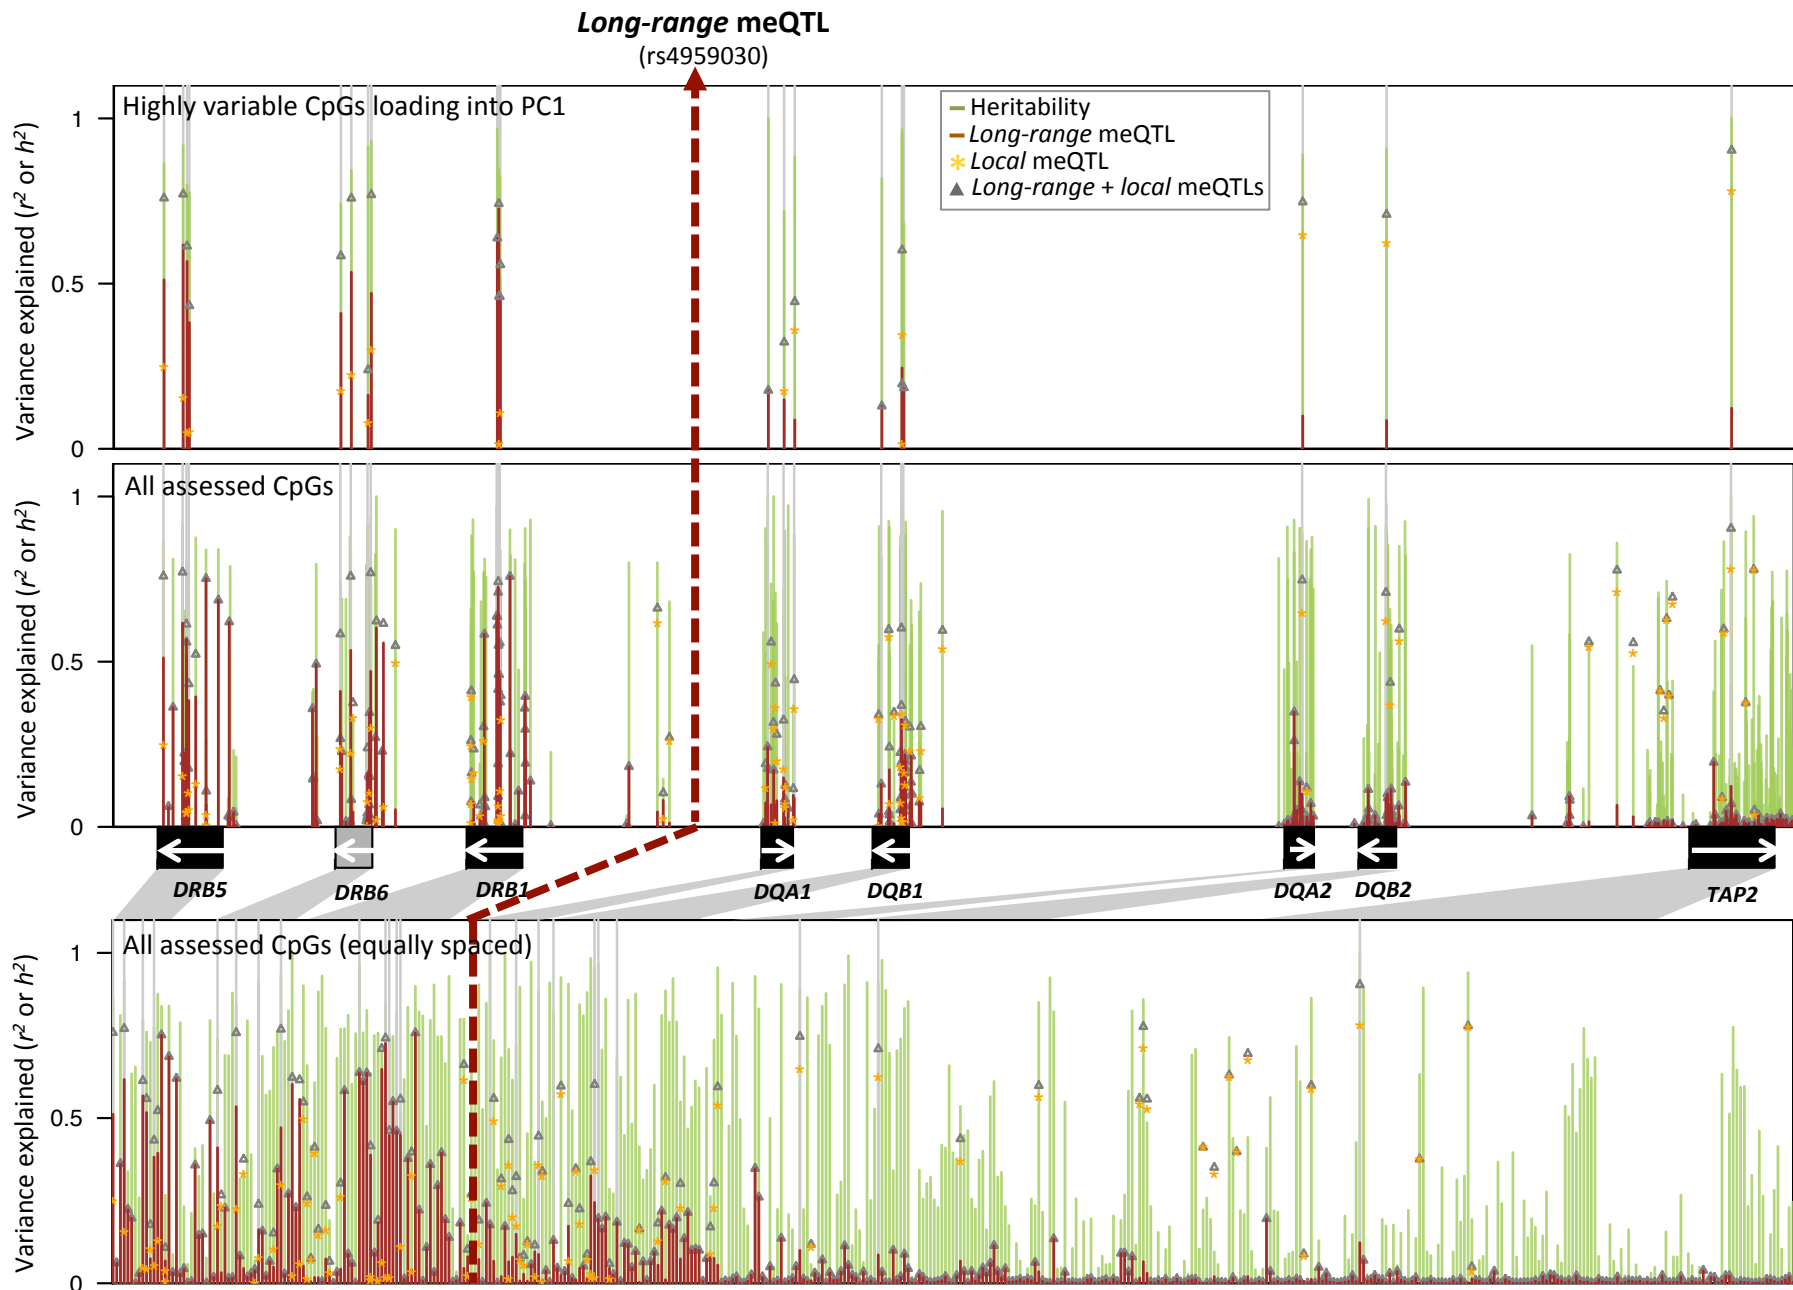

**Figure S2.** Heritability ( $h^2$ ) of DNA methylation and the relative contributions ( $r^2$ ) of the *long-range* and *local* meQTLs to methylation of CpGs within the studied 300-kb genomic region.

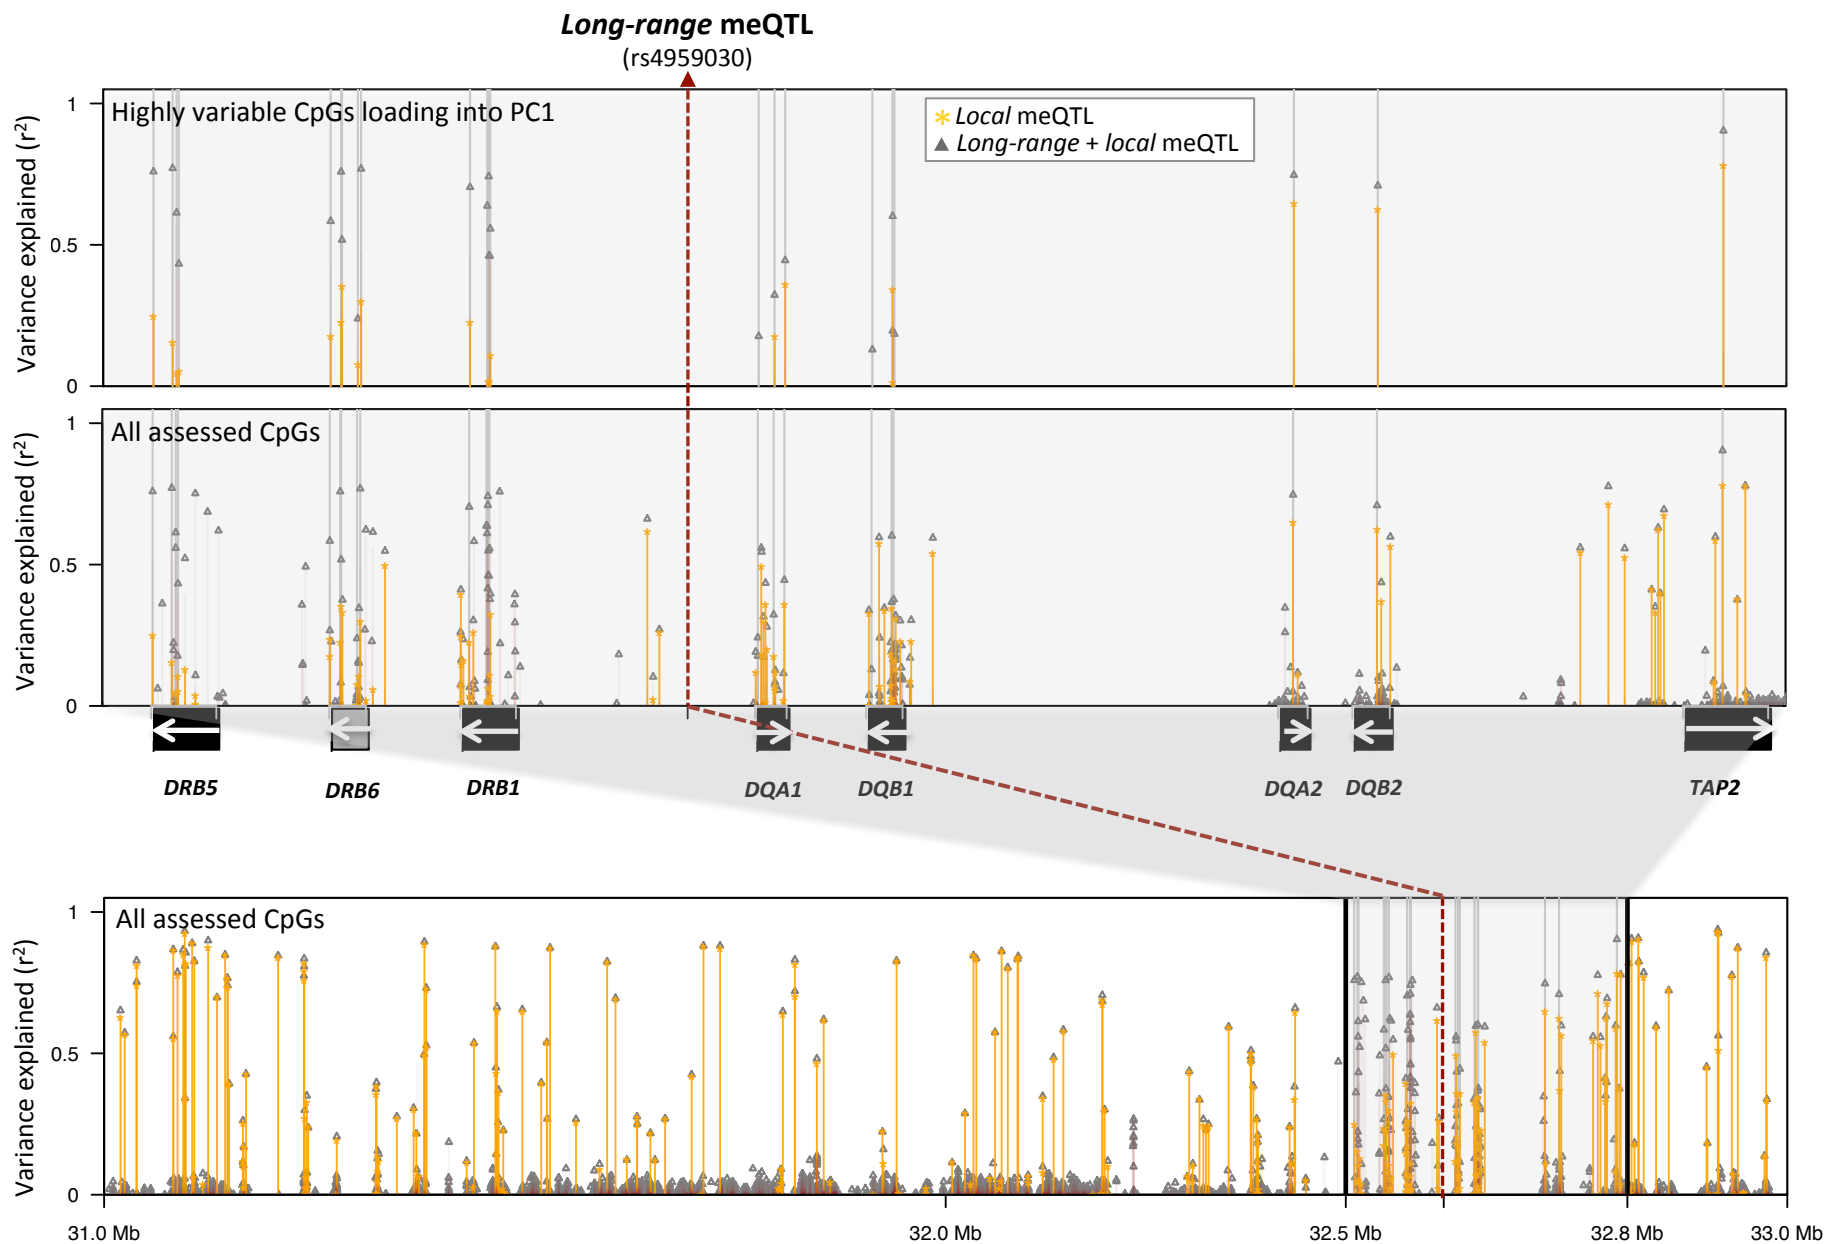

**Figure S3.** The relative contribution of *local* meQTLs to methylation of CpGs within the studied genomic region.



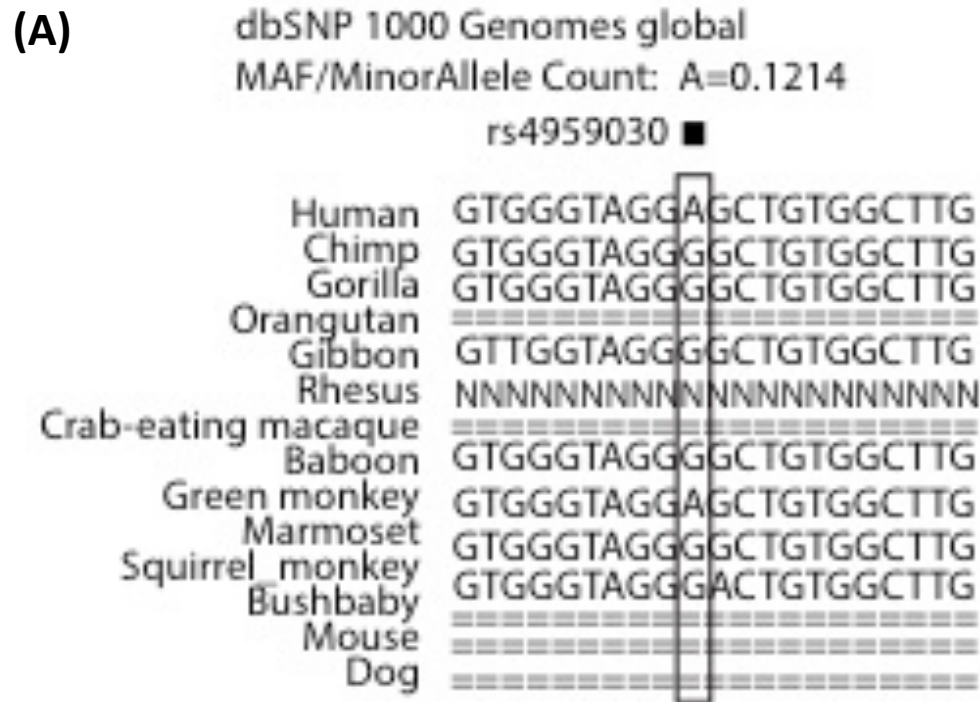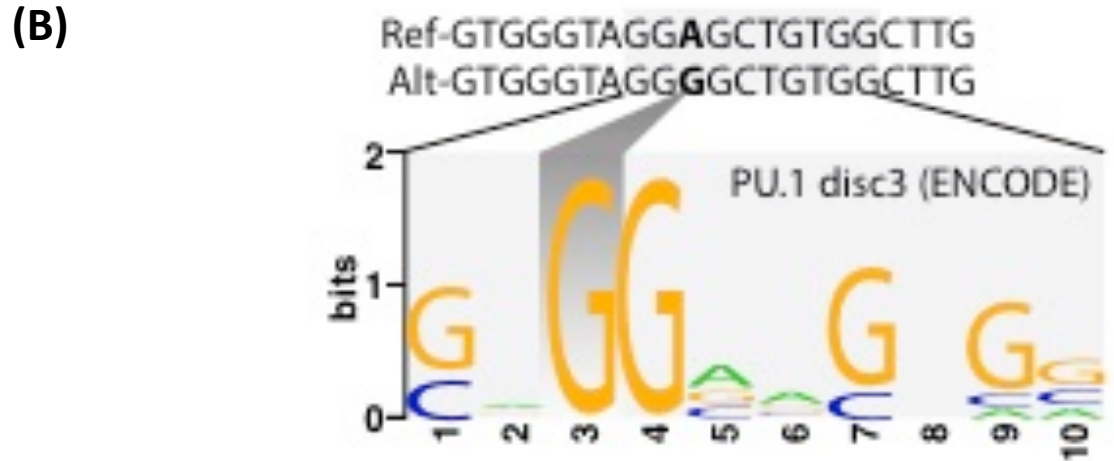

Figure S4. Inter- and intra-species analysis of the *long-range* meQTL (rs4959030).

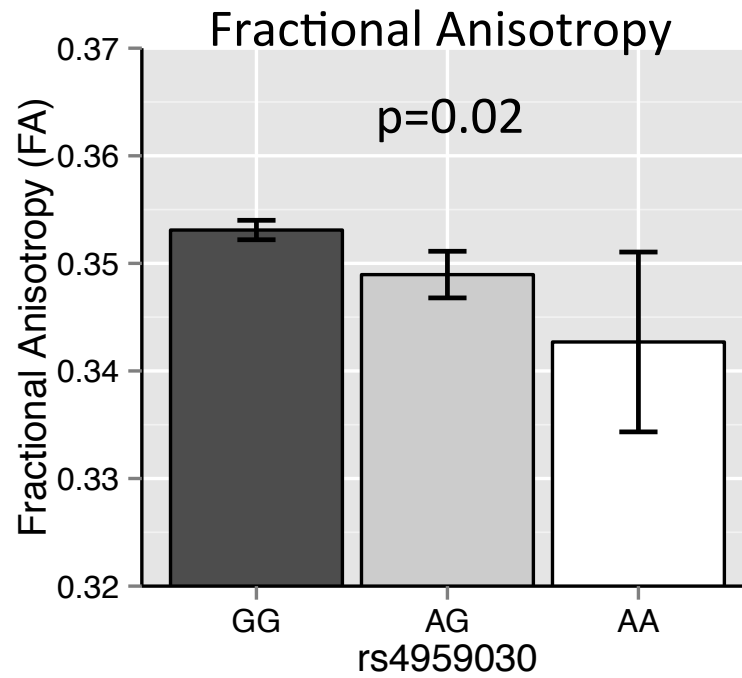

Figure S5. Association of the *long-range* meQTL (rs4959030) with fractional anisotropy assessed with diffusion tensor imaging of the human brain.

## Members of the IMAGEN Consortium

Institute of Psychiatry, King's College, London, United Kingdom

G. Schumann, P. Conrod, L. Reed, G. Barker, S. Williams, E. Loth, A. Lourdasamy, S. Costafreda, A. Cattrell, C. Nymberg, L. Topper, L. Smith, S. Havatzias, K. Stueber, C. Mallik, T. K. Clarke, D. Stacey, C. Peng Wong, H. Werts, C. Andrew, S. Desrivieres, F. Carvalho

Department of Psychiatry and Psychotherapy, Campus Charité Mitte, Charité –  
Universitätsmedizin Berlin

A. Heinz, J. Gallinat, I. Häke, N. Ivanov, A. Klär, J. Reuter, C. Palafox, C. Hohmann, C. Schilling, K. Lüdemann, A. Romanowski, A. Ströhle, E. Wolff, M. Rapp

Physikalisch-Technische Bundesanstalt, Berlin, Germany

B. Ittermann, R. Brühl, A. Ihlenfeld, B. Walaszek, F. Schubert

Institute of Neuroscience, Trinity College, Dublin, Ireland

H. Garavan, C. Connolly, J. Jones, E. Lalor, E. McCabe, A. Ní Shiothcháin, R. Whelan.

Department of Psychopharmacology, Central Institute of Mental Health, Mannheim, Germany

R. Spanagel, F. Leonardi-Essmann, W. Sommer

Department of Cognitive and Clinical Neuroscience, Central Institute of Mental Health,  
Mannheim, Germany

H. Flor, F. Nees, M. Struve

Department of Child and Adolescent Psychiatry, Central Institute of Mental Health, Mannheim,  
Germany

T. Banaschewski, L. Poustka, S. Steiner

Department of Addictive Behaviour and Addiction Medicine, Central Institute of Mental Health,  
Mannheim, Germany

K. Mann, M. Buehler, S. Vollstaedt-Klein

Department of Genetic Epidemiology in Psychiatry, Central Institute of Mental Health,  
Mannheim, Germany

M. Rietschel, E. Stolzenburg, C. Schmal

Schools of Psychology, Physics and Biomedical Sciences, University of Nottingham, United  
Kingdom

T. Paus, P. Gowland, N. Heym, C. Lawrence, C. Newman, Z. Pausova

Technische Universität Dresden, Germany

M. Smolka, T. Huebner, S. Ripke, E. Mennigen, K. Müller, V. Ziesch

Department of Systems Neuroscience, University Medical Center Hamburg-Eppendorf,  
Hamburg, Germany

C. Büchel, U. Bromberg, T. Fadai, L. Lueken, J. Yacubian, J. Finsterbusch

Institut National de la Santé et de la Recherche Médicale, Service Hospitalier Frédéric Joliot,  
Orsay, France

J-L. Martinot, E. Artiges, F. Gollier Briand, J. Massicotte, N. Bordas, R. Miranda, Z. Bricaud,  
Marie L. Paillère Martinot, N. Pionne-Dax, M. Zilbovicius, N. Boddaert, A. Cachia, J-F. Mangin

Neurospin, Commissariat à l'Energie Atomique, Paris, France

J-B. Poline, A. Barbot, Y. Schwartz, C. Lalanne, V. Frouin, B. Thyreau

Behavioural and Clinical Neurosciences Institute, Department of Experimental Psychology,  
University of Cambridge, United Kingdom

J. Dalley, A. Mar, T. Robbins, N. Subramaniam, D. Theobald, N. Richmond, M. de Rover, A  
Molander, E. Jordan

### **Members of the SYS Consortium**

Michal Abrahamowicz (McGill University)

Steffany Bennett (University of Ottawa)

Luigi Bouchard (University of Sherbrooke)

Daniel Gaudet (University of Montreal)

Gabriel Leonard (McGill University)

Tomas Paus (University of Toronto)

Zdenka Pausova (University of Toronto)

Michel Perron (University of Quebec in Chicoutimi)

Bruce Pike (University of Calgary)

Louis Richer (University of Quebec in Chicoutimi)

Jean Seguin (University of Montreal)

Suzanne Veillette (CEGEP Jonquiere)
